# Supplementary material
Source: MDPI journal article supplement (https://www.mdpi.com/2077-1312/11/5/1057)
Supplement: s1 [file s1]

## Supplementary materials

### Frequency of beach cleaning

**Table A** The frequency of beach cleaning (BC) conducted at the study site by the community.

| Frequency of beach cleaning (BC) at the study sites |             |                                |                      |                 |
|-----------------------------------------------------|-------------|--------------------------------|----------------------|-----------------|
| Types of beach cleaning                             | Pulau Lembu | Pulau Songsong                 | Teluk Aling          | Pulau Gazumbo   |
| Responsible authority                               | Once a year | -                              | Three times per week | -               |
| Local people                                        | -           | Occasionally<br>Once per month | -                    | -               |
| Volunteers                                          | -           | Occasionally<br>Once per month | -                    | Once in a while |

**Table B** Frequency of beach cleaning (BC) of the study site based on Likert scale.

| Frequency of beach cleaning (BC) at the study sites |             |                |             |               |
|-----------------------------------------------------|-------------|----------------|-------------|---------------|
| Types of beach cleaning                             | Pulau Lembu | Pulau Singsong | Teluk Aling | Pulau Gazumbo |
| Responsible authority                               | 0.08        | 0              | 2.37        | 0             |
| Local people                                        | 0           | 0.57           | 0           | 0             |
| Volunteers                                          | 0           | 0.57           | 0           | 0.01          |
| <b>Total</b>                                        | 0.08        | 1.15           | 2.37        | 0.01          |

**Table C** Guide to value given based on Likert scale to beach cleaning activities by different communities.

| Beach cleaning activities (BC) |                       |              |            |
|--------------------------------|-----------------------|--------------|------------|
| Numerical value                | Responsible authority | Local people | Volunteers |
| 0                              | None                  | None         | None       |
| 1                              | Once/month            | Once/month   | Once/month |
| 2                              | Once/week             | Once/week    | Once/week  |
| 3                              | Once/day              | Once/day     | Once/day   |
| 4                              | Twice/day             | Twice/day    | Twice/day  |

## Availability of waste bins

**Table D** Number of waste bin observed at the study site.

| Number of waste bin | Study sites |                |             |               |
|---------------------|-------------|----------------|-------------|---------------|
|                     | Pulau Lembu | Pulau Songsong | Teluk Aling | Pulau Gazumbo |
| 0                   | ✓           | -              | -           | ✓             |
| 1                   | -           | ✓              | ✓           | -             |
| 2                   | -           | -              | -           | -             |
| 3                   | -           | -              | -           | -             |
| 4                   | -           | -              | -           | -             |

**Table E** Availability of waste bins (AB) at the study site based on Likert scale.

| Availability of waste bins (AB) at study sites |             |                |             |               |
|------------------------------------------------|-------------|----------------|-------------|---------------|
| Numerical value                                | Pulau Lembu | Pulau Songsong | Teluk Aling | Pulau Gazumbo |
| 0                                              | ✓           | -              | -           | ✓             |
| 1                                              | -           | ✓              | ✓           | -             |
| 2                                              | -           | -              | -           | -             |
| 3                                              | -           | -              | -           | -             |
| 4                                              | -           | -              | -           | -             |

**Table F** Guide to value given based on Likert scale to availability of waste bins.

| Numerical value | Availability of waste bins (AB)  |
|-----------------|----------------------------------|
| 0               | Unavailable                      |
| 1               | Low availability (< 2)           |
| 2               | Moderately available (2 < X < 5) |
| 3               | Available (5 < X < 10)           |
| 4               | Highly available (> 10)          |

## Occurrence of anthropogenic activities

**Table G** Occurrence of anthropogenic activities at the study site.

| Type of anthropogenic activity | Study Sites |                |             |               |
|--------------------------------|-------------|----------------|-------------|---------------|
|                                | Pulau Lembu | Pulau Songsong | Teluk Aling | Pulau Gazumbo |
| <b>Recreational activities</b> |             |                |             |               |
| Picnicking                     | ✓           | ✓              | ✓           | ✓             |
| Camping                        | -           | ✓              | -           | -             |
| Overnight event                | -           | ✓              | -           | -             |
| Swimming                       | -           | ✓              | ✓           | -             |
| Jet Skiing                     | -           | -              | ✓           | -             |
| Parasailing                    | -           | -              | ✓           | -             |
| Recreational Boating           | ✓           | ✓              | ✓           | ✓             |
| Sunbathing                     | -           | ✓              | ✓           | -             |
| Snorkelling                    | ✓           | ✓              | -           | -             |
| Diving                         | ✓           | ✓              | -           | -             |
| Strolling                      | -           | ✓              | ✓           | ✓             |
| <b>Fishing activities</b>      |             |                |             |               |
| Leisure fishing                | -           | ✓              | ✓           | ✓             |
| Fishing village                | -           | -              | ✓           | ✓             |
| Fishing boat                   | -           | ✓              | ✓           | ✓             |
| Pre-fishing activities         | -           | -              | -           | -             |
| <b>Shipping activities</b>     | -           | -              | ✓           | -             |
| <b>Facilities and services</b> |             |                |             |               |
| Boat                           | ✓           | ✓              | ✓           | ✓             |
| <b>Total</b>                   | 5           | 12             | 12          | 7             |

**Table H** Occurrence of anthropogenic activity based on Likert scale.

| Numerical value | Study sites |                |             |               |
|-----------------|-------------|----------------|-------------|---------------|
|                 | Pulau Lembu | Pulau Songsong | Teluk Aling | Pulau Gazumbo |
| 0               | -           | -              | -           | -             |
| 1               | ✓           | -              | -           | -             |
| 2               | -           | -              | -           | ✓             |
| 3               | -           | ✓              | ✓           | -             |
| 4               | -           | -              | -           | -             |

**Table I** Guide to value given based on Likert scale to the occurrence of anthropogenic activity.

| Numerical value | Number of anthropogenic activities |
|-----------------|------------------------------------|
| 0               | None                               |
| 1               | Low (< 5)                          |
| 2               | Moderate (5 < X < 10)              |
| 3               | High (10 < X < 20)                 |
| 4               | Very high (> 20)                   |

## Occurrence of natural factors

**Table J** Occurrence of natural factor at the study site.

| Natural factor  | Study sites    |                |             |               |
|-----------------|----------------|----------------|-------------|---------------|
|                 | Pulau Lembu    | Pulau Songsong | Teluk Aling | Pulau Gazumbo |
| Winds           | ✓ <sup>2</sup> | ✓              | ✓           | ✓             |
| Waves           | ✓              | ✓              | ✓           | ✓             |
| Rainfall season | - <sup>1</sup> | -              | ✓           | ✓             |
| Storm           | -              | -              | -           | -             |
| Monsoon season  | -              | -              | -           | -             |
| <b>Total</b>    | 2              | 2              | 3           | 3             |

**Table K** Occurrence of natural factor at the study site based on Likert scale.

| Numerical value | Study sites |                |             |               |
|-----------------|-------------|----------------|-------------|---------------|
|                 | Pulau Lembu | Pulau Songsong | Teluk Aling | Pulau Gazumbo |
| 0               | -           | -              | -           | -             |
| 1               | -           | -              | -           | -             |
| 2               | ✓           | ✓              | ✓           | ✓             |
| 3               | -           | -              | -           | -             |
| 4               | -           | -              | -           | -             |

**Table L** Guide to value given based on Likert scale to the occurrence of natural factor.

| Numerical value | Frequency of occurrence of natural factors |
|-----------------|--------------------------------------------|
| 0               | None                                       |
| 1               | Low (< 1)                                  |
| 2               | Moderate (1 < X < 3)                       |
| 3               | High (3 < X < 5)                           |
| 4               | Very high (> 5)                            |
